# Supplementary material
Source: PubMed Central journal article supplement (PMC8005388)
Supplement: 40263_2021_797_MOESM3_ESM.pdf [file 40263_2021_797_MOESM3_ESM.pdf]

**Title: First-in-human randomized trial to assess safety, tolerability, pharmacokinetics and pharmacodynamics of the KDM1A inhibitor vafidemstat**

Short Title: First-in-Human of KDM1A inhibitor vafidemstat

Rosa María Antonijoan<sup>1,2</sup>, Juan Manuel Ferrero-Cafiero<sup>1</sup>, Jimena Coimbra<sup>1</sup>, Montse Punes<sup>1</sup>, Joan Martínez-Colomer<sup>1</sup>, María Isabel Arévalo<sup>3</sup>, Cristina Mascaró<sup>3</sup>, Cesar Molinero<sup>3</sup>, Carlos Buesa<sup>3</sup>, Tamara Maes<sup>3,\*</sup>.

<sup>1</sup>Centre d'Investigació del Medicament, Institut de Recerca de l'Hospital de la Santa Creu i Sant Pau (IIB-Sant Pau), Barcelona, Spain.

<sup>2</sup>Pharmacology and Therapeutics Department. Universitat Autònoma de Barcelona (UAB), Bellaterra, Spain.

<sup>3</sup>Oryzon Genomics S.A. Cornellà de Llobregat, Barcelona, Spain.

\*Corresponding author:

Tamara Maes

Address: Carrer Sant Ferran 74, 08940 Cornellà de Llobregat, Barcelona, Spain

Email: [tmaes@oryzon.com](mailto:tmaes@oryzon.com) (TM)

Telephone: +34 665602247

ORCID: 0000-0001-5104-6867

# Online Resource 3

## Supplemental Figures

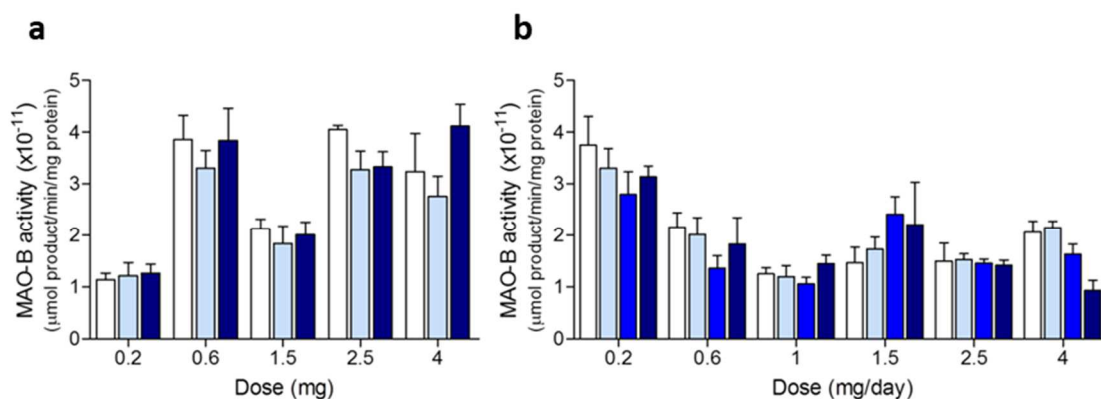

**Figure S1. Vafidemstat pharmacodynamics (PD).**

No significant inhibition is detected of **a** MAO-B activity after single ascending doses (SAD). White bars: pre-dose; light blue bars: 12 h; dark blue bars: 72 h after the first dose. **b** MAO-B activity during and after multiple ascending doses (MAD) in healthy young subjects. White bars: pre-dose; light blue bars: 12 h; medium blue bars: 108 h; dark blue bars: 192 h after the first dose. Graphs represent mean and SEM values. Volunteers sampled at each dose: n = 6 except MAD 4 mg: n = 3. Samples that did not pass quality control were omitted. SAD: Single Ascending Dose, MAD: Multiple Ascending Dose, SEM: Standard Error of the Mean.
